# Supplementary material
Source: publisher figshare collection journal article supplement (https://gsajournals.figshare.com/articles/dataset/_/6304538)
Supplement: Supplementary file 1 [file 1]

## Sheet: Orig Map
SNP Markers	Genetic distance
S1_996127	0
S1_1914349	6.66541
S1_2042095	7.63634
S1_2077731	7.92636
S1_2133526	7.92636
S1_3875425	13.3965
S1_4119785	13.9824
S1_4300264	14.4269
S1_4438295	15.6322
S1_4714966	15.6322
S1_5293998	16.7264
S1_5444177	16.8864
S1_5643357	17.2173
S1_5681094	17.6699
S1_5706572	18.1904
S1_5754335	19.2517
S1_6060025	19.2517
S1_6315301	20.8714
S1_6504619	21.2734
S1_6958423	22.0659
S1_7078400	23.3334
S1_7272589	23.3334
S1_7426415	24.8547
S1_7486290	25.9872
S1_7711543	26.1346
S1_7714362	26.1346
S1_8058736	28.0899
S1_8391154	29.598
S1_8550491	29.9056
S1_8917853	30.128
S1_9012178	30.4346
S1_9041818	30.7579
S1_9747163	31.6605
S1_9933911	31.8906
S1_10311755	33.0422
S1_10594685	33.4999
S1_11049500	34.7972
S1_11049586	34.7972
S1_11577471	37.9142
S1_12184029	39.744
S1_12184206	39.744
S1_12211022	39.9068
S1_12344668	40.0758
S1_12657395	40.4638
S1_13613893	43.6145
S1_14765342	47.3813
S1_17275119	51.358
S1_17783402	52.082
S1_18044089	53.9524
S1_18397130	55.5079
S1_19051802	56.88
S1_19165360	58.4978
S1_19430619	59.4234
S1_19829877	60.9121
S1_20264535	61.4663
S1_20384998	62.0693
S1_20634256	62.0693
S1_21268561	63.2198
S1_21380242	63.2198
S1_21983062	66.2139
S1_22318663	66.4247
S1_23117161	68.1408
S1_24523886	68.444
S1_24540364	68.6513
S1_26178932	71.1813
S1_30044149	72.2592
S1_31859926	72.2592
S1_32913700	72.2592
S1_42382338	72.6141
S1_43189169	72.6141
S1_44466447	73.9118
S1_45185767	74.1975
S1_45218246	74.1975
S1_45309773	74.1975
S1_45946335	75.599
S1_48991441	80.767
S1_49795376	83.2309
S1_49815506	83.5334
S1_50030316	84.741
S1_50297336	85.3824
S1_51649764	90.8208
S1_51770889	91.3803
S1_51826928	91.802
S1_52047311	91.802
S1_52642997	93.5541
S1_52771901	95.0358
S1_53037383	96.0136
S1_53677418	99.3431
S1_53679000	99.9833
S1_54453483	103.572
S1_54700863	104.209
S1_55211060	107.289
S1_55531911	108.95
S1_55654592	110.661
S1_57154824	119.154
S1_57643241	122.748
S1_58249003	125.532
S1_58629183	125.729
S1_59139605	128.172
S1_59440698	128.84
S1_60383946	131.911
S1_60813366	132.457
S1_61250189	133.809
S1_61783913	134.92
S1_61912352	135.584
S1_62271496	137.288
S1_62547615	137.478
S1_62802477	137.478
S1_63230011	138.732
S1_63788204	138.956
S1_63813089	138.956
S1_63950937	139.667
S1_64009027	140.336
S1_64179582	140.562
S1_65041021	144.818
S1_65162094	145.636
S1_65180291	145.878
S1_65493736	147.379
S1_65559663	147.746
S1_65816152	148.427
S1_65857651	149.097
S1_66388428	150.539
S1_66723763	151.6
S1_66860230	152.389
S1_67678981	157.735
S1_67732793	158.035
S1_68054542	159.919
S1_68202636	160.568
S1_68895673	165.132
S1_69223053	166.5
S1_69590161	169.392
S1_69934260	171.319
S1_71171673	176.438
S1_71314857	177.403
S1_71556434	178.643
S1_71788343	179.719
S1_72171624	182.146
S1_72400690	182.977
S1_73012421	186.047
S1_73434380	186.575
S2_2592891	0
S2_2617963	1.43581
S2_3073434	3.69415
S2_3195850	4.87074
S2_3283124	5.58743
S2_3505449	6.56028
S2_3794491	8.51451
S2_4624954	17.4298
S2_4718216	17.4298
S2_4834215	19.8972
S2_5429916	23.3682
S2_6080380	26.096
S2_6464767	28.5036
S2_6756054	29.8834
S2_7005176	31.3801
S2_7930509	36.9174
S2_8918896	41.708
S2_9280620	42.3997
S2_9693506	42.6645
S2_10911454	47.1885
S2_12792444	53.3602
S2_13223477	54.0514
S2_14521472	57.0275
S2_15173559	57.7818
S2_15969048	58.0956
S2_16470996	59.2474
S2_19848147	60.6855
S2_51527482	64.2688
S2_52019609	64.5076
S2_52779463	64.7751
S2_56603341	73.4141
S2_57863320	76.5861
S2_57941730	76.9313
S2_58025237	77.32
S2_58195059	77.647
S2_58867008	82.6401
S2_58867102	82.6401
S2_59144465	84.8363
S2_59624821	87.2996
S2_60095607	90.9989
S2_60832291	93.8943
S2_61753148	97.6705
S2_62730119	103.122
S2_63093734	105.062
S2_63672382	108.105
S2_63696158	108.915
S2_63835865	109.241
S2_63874015	109.7
S2_63911271	110.362
S2_65535874	118.403
S2_65688971	119.36
S2_65991011	120.381
S2_66356003	121.506
S2_66508286	122.121
S2_66687425	122.861
S2_67236804	123.608
S2_67434583	125.244
S2_67797056	126.742
S2_67956861	127.218
S2_68839811	131.191
S2_69842150	135.175
S2_70553450	139.948
S2_70981475	141.375
S2_71552613	145.087
S2_71556171	145.341
S2_71585033	145.341
S2_71900554	147.115
S2_71900637	147.115
S2_71978562	147.279
S2_72398767	148.025
S2_72657538	149.477
S2_72745014	150.455
S2_72883180	152.483
S2_72932896	152.864
S2_73472969	155.403
S2_73706160	156.861
S2_73851388	157.521
S2_74612680	160.347
S2_74686312	160.528
S2_76133953	166.369
S2_76260612	166.556
S2_76560479	169.063
S2_77217517	173.245
S3_700571	0
S3_1639019	4.65421
S3_1891966	5.21698
S3_2140742	6.83283
S3_2870471	11.3389
S3_2960298	11.9667
S3_3151943	13.9044
S3_3220503	15.1952
S3_3807824	17.8218
S3_4044381	18.747
S3_4894491	25.348
S3_5218087	27.5834
S3_5218139	27.9796
S3_5639799	29.2666
S3_5871885	30.6842
S3_6086893	30.961
S3_6201947	33.0467
S3_6753270	35.9353
S3_6928883	37.7423
S3_6994358	37.8951
S3_7156629	37.9688
S3_7210903	38.6804
S3_7401342	39.4326
S3_7463542	39.929
S3_8625002	44.8844
S3_8817567	46.8826
S3_9989744	52.7467
S3_10563297	55.6746
S3_10825010	56.2303
S3_11274375	56.982
S3_12373018	61.8589
S3_13726909	65.4215
S3_14257059	66.0503
S3_15818335	70.2977
S3_51273544	71.4235
S3_51951381	73.8174
S3_52841185	74.1416
S3_55595734	83.2104
S3_56907647	88.9056
S3_58088480	96.4544
S3_58903994	100.801
S3_59210503	101.009
S3_59323605	102.109
S3_59402287	102.537
S3_59640397	103.047
S3_59695897	103.475
S3_59810144	104.046
S3_60128105	104.972
S3_60157803	105.609
S3_60589079	106.543
S3_60927659	109.217
S3_61428691	110.523
S3_61495053	111.617
S3_61703004	112.527
S3_61797191	112.74
S3_61890571	113.312
S3_62452403	115.251
S3_63002635	116.054
S3_63218283	117.446
S3_63218419	117.446
S3_63282395	118.173
S3_63368934	118.836
S3_64221823	120.627
S3_64404679	121.403
S3_64712327	121.862
S3_64879738	122.679
S3_65817091	125.14
S3_66453097	128.002
S3_66618204	128.833
S3_67893861	132.28
S3_68270311	133.543
S3_68735604	134.756
S3_68874742	135.018
S3_69188352	137.025
S3_69649683	137.856
S3_71508071	148.88
S3_72457332	153.433
S3_72687125	154.214
S3_72687146	154.214
S3_73241848	158.557
S4_159413	0
S4_353113	0.0708795
S4_699915	1.59618
S4_1051005	3.42959
S4_1072297	3.81342
S4_1312217	4.13019
S4_2577332	11.9057
S4_3382927	15.9672
S4_4003050	19.5937
S4_4271211	22.4394
S4_4530630	24.9522
S4_6904556	42.9638
S4_7198942	44.3323
S4_7383579	46.1075
S4_8363150	51.3532
S4_8583655	52.4396
S4_8880891	55.3297
S4_9669108	58.444
S4_10727657	63.003
S4_11066463	63.003
S4_12407348	66.2692
S4_25146798	67.7872
S4_48571849	70.3868
S4_53529878	91.5289
S4_54810709	95.7663
S4_54983711	97.1628
S4_55037717	97.36
S4_55870265	99.6912
S4_56086785	100.565
S4_56939367	103.936
S4_58935800	113.419
S4_59462696	115.415
S4_59968684	116.787
S4_60114467	117.727
S4_60158300	118.114
S4_60493153	120.337
S4_60838827	122.466
S4_61161519	123.23
S4_61304986	124.888
S4_61555802	126.376
S4_61878324	129.436
S4_62358740	131.886
S4_62367594	131.886
S4_62396275	132.353
S4_63071929	136.887
S4_63209954	137.14
S4_63700019	140.959
S4_63820818	141.675
S4_64228817	143.515
S4_64331847	144.048
S4_64487011	145.049
S4_65158848	148.191
S4_65766625	150.569
S4_66248053	152.257
S4_66856259	156.027
S4_66865408	156.027
S4_67625248	158.923
S5_443911	0
S5_1491559	2.81341
S5_4819028	30.3824
S5_5097762	31.7065
S5_6130027	36.9028
S5_7447433	44.5948
S5_13001287	55.4085
S5_47691684	58.818
S5_49406190	60.0041
S5_49934699	62.8055
S5_50937123	64.065
S5_52230721	67.3901
S5_54775573	73.7002
S5_54776076	73.7002
S5_55700290	80.8883
S5_57903054	91.4782
S5_58250527	93.855
S5_58585984	95.9341
S5_58736655	97.7201
S5_60159698	105.804
S5_61643892	116.848
S5_61729063	117.28
S5_62238457	119.203
S6_1521917	0
S6_39630741	14.6372
S6_42355778	19.8964
S6_44730473	23.8648
S6_44817835	23.8648
S6_44860369	23.8648
S6_45454406	26.5815
S6_45454594	26.5815
S6_45713625	29.0803
S6_46141212	32.2007
S6_46222464	32.6389
S6_47239380	40.6859
S6_48189884	41.9078
S6_48521361	43.8454
S6_48878265	45.0459
S6_49287640	47.6824
S6_49643220	49.1429
S6_49715516	49.379
S6_50365259	51.2477
S6_50539910	51.4587
S6_50626743	52.5219
S6_51140222	54.4862
S6_51726989	56.2895
S6_52036046	58.9117
S6_52141958	60.2384
S6_52746065	61.5508
S6_53024770	63.4236
S6_53461592	65.0415
S6_53653469	66.4575
S6_53661471	66.6895
S6_54392368	70.1938
S6_55548677	74.0312
S6_56037572	75.609
S6_56646221	81.0139
S6_57867095	85.6674
S6_58139826	86.7157
S6_58414069	88.7848
S6_58531384	89.0335
S6_58810452	90.0766
S6_58900896	90.8506
S6_58961166	90.8506
S6_59306006	94.2924
S6_59364471	95.7882
S6_59795177	98.1234
S6_60253893	100.026
S6_60407679	101.752
S6_60499220	101.752
S6_60832933	103.508
S6_60932972	103.508
S6_61208773	104.943
S6_61208936	104.943
S6_61440244	106.601
S6_61535145	106.945
S7_1147401	0
S7_1861602	4.25502
S7_2176672	7.51423
S7_2921982	14.0478
S7_3055489	15.7053
S7_4376607	24.5217
S7_4780777	30.9823
S7_6784608	48.4848
S7_6968877	49.8434
S7_8843716	56.5679
S7_11967298	60.7677
S7_40382497	61.0054
S7_48970089	61.0054
S7_53130309	63.8486
S7_53167458	63.8486
S7_53704344	64.3174
S7_54507551	65.7647
S7_55277054	68.5918
S7_56127651	71.9922
S7_56216365	72.6139
S7_56267417	73.2147
S7_56890374	76.6331
S7_57736751	81.2838
S7_58394735	86.9574
S7_59450874	95.7891
S7_59487289	96.6671
S7_59874150	99.4195
S7_59921215	100.084
S7_60056219	100.383
S7_60704271	103.871
S7_60839810	104.432
S7_61205886	106.998
S7_61308415	108.112
S7_61343812	108.112
S7_61743374	110.905
S7_61884493	112.154
S7_62039773	113.347
S7_62653284	118.459
S7_62806212	119.022
S7_63061384	120.733
S7_63107211	120.733
S7_63642798	122.845
S7_64147866	124.863
S7_64307792	124.978
S8_1220994	0
S8_2351983	9.8053
S8_2558382	10.9509
S8_2709125	12.7275
S8_4292328	30.1962
S8_6055856	40.5311
S8_6056426	40.5311
S8_6154294	41.4018
S8_6154754	41.4018
S8_6154911	41.6392
S8_6196114	41.6392
S8_7738160	46.1747
S8_11132623	46.8072
S8_11132626	46.8072
S8_27822232	48.3414
S8_38534649	48.5321
S8_38534789	48.5321
S8_45760605	50.3676
S8_45760727	50.5539
S8_47226821	56.1615
S8_47285438	56.3398
S8_47509086	58.7517
S8_47595585	59.7221
S8_47807933	60.6919
S8_50150678	70.2231
S8_50230933	72.6126
S8_50379822	72.6126
S8_51832449	79.7573
S8_52305231	83.2127
S8_52403957	84.4446
S8_52822809	86.3864
S8_53092639	89.209
S8_53263129	90.6241
S8_53611077	95.1746
S8_54415360	100.793
S9_57352	0
S9_381828	0.282777
S9_1805149	14.6973
S9_4013764	36.0883
S9_4535057	39.2378
S9_5394048	45.092
S9_6279989	49.3273
S9_8620524	56.5329
S9_9701143	59.3645
S9_11977169	60.7501
S9_38827362	60.7501
S9_42878787	61.2362
S9_43043111	61.6602
S9_44159604	62.0448
S9_47191350	64.9175
S9_47399448	66.5344
S9_47695586	66.7375
S9_48134606	68.4902
S9_49065056	72.9175
S9_49372007	74.0744
S9_50000872	76.6442
S9_50536943	79.6341
S9_50715360	80.1285
S9_50725635	80.5146
S9_50734667	80.5146
S9_51983645	87.5962
S9_52118194	87.8068
S9_52576478	90.3177
S9_52885568	93.13
S9_52888868	93.6484
S9_52890009	93.6484
S9_53139893	97.1222
S9_55750034	105.254
S9_56125890	107.226
S9_59334797	119.581
S9_59532158	120.516
S10_1270568	0
S10_1350309	1.36921
S10_1781444	4.82959
S10_2107884	6.02356
S10_2581551	10.3594
S10_2751996	13.2437
S10_3098940	15.3182
S10_3639770	20.4041
S10_4146463	21.5225
S10_4534006	23.1628
S10_4650639	24.4968
S10_4822519	25.3388
S10_5113336	26.8505
S10_5253643	28.6206
S10_5699754	32.0863
S10_6424330	35.3378
S10_6732567	38.058
S10_7288327	38.8826
S10_8081773	44.152
S10_8140663	44.5158
S10_8603619	46.1564
S10_8749440	46.1564
S10_9792283	49.9924
S10_9938693	50.1453
S10_12261112	53.3795
S10_17059647	54.3977
S10_18192755	55.3586
S10_44089727	55.3586
S10_47225278	56.1487
S10_47834967	56.9672
S10_48084248	57.7283
S10_48926490	60.6373
S10_49433481	61.1007
S10_49433516	61.1007
S10_50151749	62.2925
S10_50521034	62.8526
S10_51202718	64.1962
S10_51494508	64.8627
S10_51756627	66.2976
S10_51756774	66.2976
S10_52241838	68.0334
S10_52473813	70.1263
S10_52669983	71.2891
S10_53354348	72.7809
S10_53767052	76.2814
S10_54087004	78.4441
S10_55174111	82.7766
S10_55279847	83.9231
S10_55949337	88.5757
S10_56511367	90.9061
S10_56740774	93.0603
S10_57382061	96.922
S10_57428185	98.1878
S10_57986848	102.889
S10_57986849	102.889
S10_57986857	102.889
S10_58152927	105.095
S10_58284826	106.591
S10_58600031	109.246
S10_58888012	110.424
S10_59265285	111.997
S10_59656735	115.099
S10_59882311	116.022
S10_60305595	119.749
S10_60560672	120.583

## Sheet: Bin Map
Chromosome	Bin Name	Genetic Location	SNPs within Each Bin	Original Genetic Locaiton for Each SNP
1	bin1.1	0	S1_996127	0
1	bin1.2	7.63323	S1_1914349 S1_2042095 S1_2077731 S1_2133526	6.665410732 7.63634451 7.926366653 7.926367703
1	bin1.3	13.7524	S1_3875425 S1_4119785 S1_4300264	13.39649829 13.98237621 14.42686646
1	bin1.4	14.9422	S1_4438295 S1_4714966	15.63220673 15.63220778
1	bin1.5	16.7391	S1_5293998 S1_5444177 S1_5643357 S1_5681094 S1_5706572	16.72638253 16.88638578 17.21726856 17.66989168 18.19038139
1	bin1.6	18.5213	S1_5754335 S1_6060025	19.25169829 19.25169934
1	bin1.7	20.7666	S1_6315301 S1_6504619 S1_6958423	20.87141577 21.27340026 22.06589415
1	bin1.8	22.6757	S1_7078400 S1_7272589	23.33346671 23.33346776
1	bin1.9	24.3735	S1_7426415	24.8548
1	bin1.10	25.6685	S1_7486290 S1_7711543 S1_7714362	25.98718186 26.13461496 26.13461601
1	bin1.11	28.2788	S1_8058736	28.0899
1	bin1.12	31.0927	S1_8391154 S1_8550491 S1_8917853 S1_9012178 S1_9041818 S1_9747163 S1_9933911	29.5980677 29.90560055 30.12801972 30.43467645 30.75792597 31.66055095 31.89062681
1	bin1.13	32.7653	S1_10311755 S1_10594685	33.04225263 33.4999219
1	bin1.14	34.6542	S1_11049500 S1_11049586	34.79726618 34.79726723
1	bin1.15	38.1044	S1_11577471	37.9143
1	bin1.16	40.2545	S1_12184029 S1_12184206 S1_12211022 S1_12344668 S1_12657395	39.74405292 39.74405431 39.90681862 40.07589016 40.46381934
1	bin1.17	43.6005	S1_13613893	43.6145
1	bin1.18	47.9642	S1_14765342	47.3813
1	bin1.19	52.5199	S1_17275119 S1_17783402	51.35806338 52.08204296
1	bin1.20	54.7652	S1_18044089	53.9524
1	bin1.21	56.3482	S1_18397130	55.508
1	bin1.22	57.9304	S1_19051802	56.8801
1	bin1.23	60.2313	S1_19165360 S1_19430619	58.49784963 59.42345279
1	bin1.24	62.8684	S1_19829877 S1_20264535 S1_20384998 S1_20634256	60.91215235 61.4663345 62.06935381 62.06935486
1	bin1.25	64.4604	S1_21268561 S1_21380242	63.21987629 63.21987734
1	bin1.26	67.8351	S1_21983062 S1_22318663	66.21395842 66.42478414
1	bin1.27	69.9859	S1_23117161 S1_24523886 S1_24540364	68.14091056 68.44405225 68.65138353
1	bin1.28	73.0682	S1_26178932	71.1814
1	bin1.29	74.2135	S1_30044149 S1_31859926 S1_32913700 S1_42382338 S1_43189169	72.25927933 72.25928038 72.25928143 72.61418217 72.61418322
1	bin1.30	75.4112	S1_44466447 S1_45185767 S1_45218246 S1_45309773	73.91191954 74.19756282 74.19756387 74.19756492
1	bin1.31	76.867	S1_45946335	75.599
1	bin1.32	81.9359	S1_48991441	80.7671
1	bin1.33	84.6415	S1_49795376 S1_49815506	83.23095887 83.53347216
1	bin1.34	86.1609	S1_50030316 S1_50297336	84.74112787 85.38250029
1	bin1.35	92.4759	S1_51649764 S1_51770889 S1_51826928 S1_52047311	90.82083571 91.38035124 91.80206309 91.80206414
1	bin1.36	94.5229	S1_52642997	93.5542
1	bin1.37	96.4965	S1_52771901 S1_53037383	95.03585235 96.01372476
1	bin1.38	100.997	S1_53677418 S1_53679000	99.34322912 99.98337267
1	bin1.39	105.165	S1_54453483 S1_54700863	103.5725554 104.2087568
1	bin1.40	108.738	S1_55211060	107.289
1	bin1.41	110.514	S1_55531911	108.95
1	bin1.42	112.448	S1_55654592	110.661
1	bin1.43	121.061	S1_57154824	119.154
1	bin1.44	124.939	S1_57643241	122.748
1	bin1.45	128.03	S1_58249003 S1_58629183	125.5324862 125.7295921
1	bin1.46	130.953	S1_59139605 S1_59440698	128.1717493 128.8397911
1	bin1.47	134.912	S1_60383946 S1_60813366	131.9112971 132.4573343
1	bin1.48	136.488	S1_61250189	133.809
1	bin1.49	137.942	S1_61783913 S1_61912352	134.9205462 135.5837849
1	bin1.50	139.972	S1_62271496 S1_62547615 S1_62802477	137.2884574 137.4779828 137.4779838
1	bin1.51	141.503	S1_63230011 S1_63788204 S1_63813089 S1_63950937 S1_64009027 S1_64179582	138.7322067 138.9557584 138.9557594 139.6675939 140.3358157 140.5623587
1	bin1.52	147.898	S1_65041021 S1_65162094 S1_65180291	144.8181859 145.636433 145.87856
1	bin1.53	150.478	S1_65493736 S1_65559663 S1_65816152 S1_65857651	147.379297 147.7462914 148.4270261 149.0966422
1	bin1.54	152.823	S1_66388428	150.539
1	bin1.55	154.372	S1_66723763 S1_66860230	151.6002538 152.3894784
1	bin1.56	160.453	S1_67678981 S1_67732793	157.7355474 158.0355238
1	bin1.57	162.711	S1_68054542 S1_68202636	159.9195044 160.5684952
1	bin1.58	167.47	S1_68895673	165.133
1	bin1.59	169.04	S1_69223053	166.5
1	bin1.60	172.121	S1_69590161	169.392
1	bin1.61	174.116	S1_69934260	171.319
1	bin1.62	179.878	S1_71171673 S1_71314857	176.4377739 177.4033102
1	bin1.63	181.827	S1_71556434	178.643
1	bin1.64	183.059	S1_71788343	179.72
1	bin1.65	186.043	S1_72171624 S1_72400690	182.1459126 182.9768259
1	bin1.66	189.71	S1_73012421 S1_73434380	186.0468559 186.5751068
2	bin2.1	0	S2_2592891	0
2	bin2.2	1.66177	S2_2617963	1.43581
2	bin2.3	4.11915	S2_3073434	3.69415
2	bin2.4	5.97408	S2_3195850 S2_3283124 S2_3505449	4.870743963 5.587435443 6.560281308
2	bin2.5	8.89676	S2_3794491	8.51452
2	bin2.6	17.9955	S2_4624954 S2_4718216	17.42983932 17.42984037
2	bin2.7	20.552	S2_4834215	19.8972
2	bin2.8	24.167	S2_5429916	23.3682
2	bin2.9	27.0753	S2_6080380	26.096
2	bin2.10	29.4654	S2_6464767	28.5037
2	bin2.11	31.1536	S2_6756054	29.8834
2	bin2.12	32.7744	S2_7005176	31.3801
2	bin2.13	38.3684	S2_7930509	36.9175
2	bin2.14	43.8185	S2_8918896 S2_9280620 S2_9693506	41.70799577 42.39973582 42.66448252
2	bin2.15	48.6946	S2_10911454	47.1885
2	bin2.16	55.3226	S2_12792444 S2_13223477	53.3601901 54.05139221
2	bin2.17	59.1681	S2_14521472 S2_15173559 S2_15969048	57.02747309 57.78182748 58.09559463
2	bin2.18	60.8454	S2_16470996	59.2475
2	bin2.19	62.3244	S2_19848147	60.6856
2	bin2.20	66.3542	S2_51527482 S2_52019609 S2_52779463	64.26886546 64.50763761 64.77514111
2	bin2.21	75.6818	S2_56603341	73.4141
2	bin2.22	79.4686	S2_57863320 S2_57941730 S2_58025237 S2_58195059	76.586161 76.93128707 77.32008237 77.64700321
2	bin2.23	84.8978	S2_58867008 S2_58867102	82.64016207 82.64016312
2	bin2.24	87.236	S2_59144465	84.8363
2	bin2.25	89.8451	S2_59624821	87.2996
2	bin2.26	93.7775	S2_60095607	90.9989
2	bin2.27	96.9271	S2_60832291	93.8944
2	bin2.28	100.802	S2_61753148	97.6706
2	bin2.29	106.344	S2_62730119	103.122
2	bin2.30	108.461	S2_63093734	105.062
2	bin2.31	112.094	S2_63672382 S2_63696158 S2_63835865 S2_63874015 S2_63911271	108.1046246 108.9151085 109.2409897 109.6999527 110.3624969
2	bin2.32	121.839	S2_65535874 S2_65688971	118.4034133 119.3598829
2	bin2.33	123.469	S2_65991011	120.381
2	bin2.34	125.547	S2_66356003 S2_66508286 S2_66687425 S2_67236804	121.5062267 122.1211669 122.8614103 123.6077156
2	bin2.35	128.638	S2_67434583	125.244
2	bin2.36	130.694	S2_67797056 S2_67956861	126.7420857 127.2180374
2	bin2.37	135.117	S2_68839811	131.191
2	bin2.38	139.357	S2_69842150	135.175
2	bin2.39	144.244	S2_70553450	139.948
2	bin2.40	145.819	S2_70981475	141.375
2	bin2.41	149.821	S2_71552613 S2_71556171 S2_71585033	145.0871594 145.3406989 145.3407
2	bin2.42	152.455	S2_71900554 S2_71900637 S2_71978562 S2_72398767	147.1145922 147.1145932 147.2786099 148.0249604
2	bin2.43	155.44	S2_72657538 S2_72745014	149.4768843 150.4548136
2	bin2.44	158.312	S2_72883180 S2_72932896	152.4833682 152.8641248
2	bin2.45	161.185	S2_73472969	155.403
2	bin2.46	163.059	S2_73706160 S2_73851388	156.861518 157.5210119
2	bin2.47	166.743	S2_74612680 S2_74686312	160.3470417 160.5281127
2	bin2.48	172.996	S2_76133953 S2_76260612	166.3693581 166.5559593
2	bin2.49	175.713	S2_76560479	169.063
2	bin2.50	180.157	S2_77217517	173.246
3	bin3.1	0	S3_700571	0
3	bin3.2	5.24238	S3_1639019 S3_1891966	4.654210991 5.21697838
3	bin3.3	7.14757	S3_2140742	6.83283
3	bin3.4	12.3186	S3_2870471 S3_2960298	11.33892341 11.9667165
3	bin3.5	14.7474	S3_3151943	13.9044
3	bin3.6	16.5407	S3_3220503	15.1952
3	bin3.7	19.6382	S3_3807824 S3_4044381	17.82177533 18.74700598
3	bin3.8	26.4022	S3_4894491	25.348
3	bin3.9	28.7025	S3_5218087 S3_5218139	27.58345426 27.97958256
3	bin3.10	30.0804	S3_5639799	29.2666
3	bin3.11	31.6556	S3_5871885 S3_6086893	30.68417461 30.96100135
3	bin3.12	33.9945	S3_6201947	33.0468
3	bin3.13	37.1317	S3_6753270	35.9353
3	bin3.14	39.087	S3_6928883 S3_6994358 S3_7156629 S3_7210903 S3_7401342 S3_7463542	37.74234998 37.89514707 37.9688005 38.68041518 39.43263916 39.92898093
3	bin3.15	45.2867	S3_8625002	44.8844
3	bin3.16	47.6421	S3_8817567	46.8826
3	bin3.17	53.8878	S3_9989744	52.7467
3	bin3.18	57.3306	S3_10563297 S3_10825010 S3_11274375	55.67463406 56.23036599 56.98205252
3	bin3.19	63.1193	S3_12373018	61.8589
3	bin3.20	67.1524	S3_13726909 S3_14257059	65.42152341 66.05031112
3	bin3.21	71.7335	S3_15818335	70.2978
3	bin3.22	73.0106	S3_51273544	71.4235
3	bin3.23	75.6009	S3_51951381 S3_52841185	73.8174616 74.14158645
3	bin3.24	85.1533	S3_55595734	83.2104
3	bin3.25	91.0372	S3_56907647	88.9057
3	bin3.26	98.7777	S3_58088480	96.4544
3	bin3.27	103.669	S3_58903994 S3_59210503	100.8009474 101.0091203
3	bin3.28	105.251	S3_59323605 S3_59402287 S3_59640397 S3_59695897 S3_59810144 S3_60128105 S3_60157803 S3_60589079	102.1094172 102.5367132 103.0469524 103.4753765 104.0458197 104.9723157 105.6092378 106.543346
3	bin3.29	110.413	S3_60927659	109.217
3	bin3.30	111.944	S3_61428691	110.523
3	bin3.31	113.756	S3_61495053 S3_61703004 S3_61797191 S3_61890571	111.617087 112.5274194 112.7396582 113.3120569
3	bin3.32	116.579	S3_62452403 S3_63002635	115.250861 116.0536792
3	bin3.33	118.841	S3_63218283 S3_63218419 S3_63282395 S3_63368934	117.446205 117.4462061 118.1735373 118.8365147
3	bin3.34	122.407	S3_64221823 S3_64404679 S3_64712327 S3_64879738	120.6274185 121.4030773 121.8616467 122.6790478
3	bin3.35	126.172	S3_65817091	125.141
3	bin3.36	129.634	S3_66453097 S3_66618204	128.0023165 128.832841
3	bin3.37	133.672	S3_67893861	132.28
3	bin3.38	135.124	S3_68270311	133.543
3	bin3.39	136.453	S3_68735604 S3_68874742	134.756345 135.0178806
3	bin3.40	138.867	S3_69188352 S3_69649683	137.0249071 137.856218
3	bin3.41	150.642	S3_71508071	148.88
3	bin3.42	155.7	S3_72457332 S3_72687125 S3_72687146	153.4327145 154.2144017 154.2144027
3	bin3.43	160.686	S3_73241848	158.557
4	bin4.1	0	S4_159413 S4_353113	0 0.070880504
4	bin4.2	1.70069	S4_699915	1.59618
4	bin4.3	3.79271	S4_1051005 S4_1072297 S4_1312217	3.429589984 3.813427541 4.130194896
4	bin4.4	12.1716	S4_2577332	11.9057
4	bin4.5	16.4495	S4_3382927	15.9672
4	bin4.6	20.229	S4_4003050	19.5937
4	bin4.7	23.1543	S4_4271211	22.4394
4	bin4.8	25.8073	S4_4530630	24.9522
4	bin4.9	43.8924	S4_6904556	42.9638
4	bin4.10	45.3379	S4_7198942	44.3323
4	bin4.11	47.1708	S4_7383579	46.1075
4	bin4.12	52.5043	S4_8363150	51.3532
4	bin4.13	53.9526	S4_8583655	52.4396
4	bin4.14	57.1307	S4_8880891	55.3297
4	bin4.15	60.6636	S4_9669108	58.444
4	bin4.16	65.5418	S4_10727657 S4_11066463	63.00301179 63.00301284
4	bin4.17	68.8875	S4_12407348	66.2692
4	bin4.18	70.5043	S4_25146798	67.7872
4	bin4.19	73.2562	S4_48571849	70.3869
4	bin4.20	94.518	S4_53529878	91.5289
4	bin4.21	99.0855	S4_54810709	95.7663
4	bin4.22	100.762	S4_54983711 S4_55037717	97.16281117 97.35998973
4	bin4.23	103.611	S4_55870265 S4_56086785	99.69121038 100.5654614
4	bin4.24	107.65	S4_56939367	103.936
4	bin4.25	117.313	S4_58935800	113.419
4	bin4.26	119.513	S4_59462696	115.415
4	bin4.27	121.554	S4_59968684 S4_60114467 S4_60158300	116.7867177 117.7274799 118.1136951
4	bin4.28	124.432	S4_60493153	120.337
4	bin4.29	127.089	S4_60838827 S4_61161519	122.4660827 123.2304018
4	bin4.30	129.376	S4_61304986	124.888
4	bin4.31	131.205	S4_61555802	126.376
4	bin4.32	134.478	S4_61878324	129.436
4	bin4.33	137.09	S4_62358740 S4_62367594 S4_62396275	131.8857053 131.8857064 132.3531595
4	bin4.34	142.248	S4_63071929 S4_63209954	136.8868903 137.1396975
4	bin4.35	146.572	S4_63700019 S4_63820818	140.9592298 141.6753276
4	bin4.36	149.277	S4_64228817 S4_64331847	143.5148517 144.0483254
4	bin4.37	150.377	S4_64487011	145.049
4	bin4.38	153.576	S4_65158848	148.191
4	bin4.39	156.074	S4_65766625	150.569
4	bin4.40	157.924	S4_66248053	152.257
4	bin4.41	161.772	S4_66856259 S4_66865408	156.0272881 156.0272892
4	bin4.42	164.86	S4_67625248	158.923
5	bin5.1	0	S5_443911	0
5	bin5.2	3.02893	S5_1491559	2.81341
5	bin5.3	30.5961	S5_4819028	30.3824
5	bin5.4	32.1636	S5_5097762	31.7065
5	bin5.5	37.6667	S5_6130027	36.9028
5	bin5.6	45.646	S5_7447433	44.5948
5	bin5.7	56.6493	S5_13001287	55.4086
5	bin5.8	60.2076	S5_47691684	58.818
5	bin5.9	61.3855	S5_49406190	60.0041
5	bin5.10	64.4472	S5_49934699	62.8055
5	bin5.11	66.1742	S5_50937123	64.065
5	bin5.12	69.7541	S5_52230721	67.3901
5	bin5.13	76.1944	S5_54775573 S5_54776076	73.70017982 73.70018087
5	bin5.14	83.4796	S5_55700290	80.8883
5	bin5.15	94.2748	S5_57903054	91.4782
5	bin5.16	96.9404	S5_58250527	93.855
5	bin5.17	99.4848	S5_58585984	95.9342
5	bin5.18	101.642	S5_58736655	97.7201
5	bin5.19	109.717	S5_60159698	105.804
5	bin5.20	121.44	S5_61643892 S5_61729063	116.8482859 117.2795696
5	bin5.21	123.698	S5_62238457	119.203
6	bin6.1	0	S6_1521917	0
6	bin6.2	14.9165	S6_39630741	14.6372
6	bin6.3	20.4622	S6_42355778	19.8964
6	bin6.4	24.5991	S6_44730473 S6_44817835 S6_44860369	23.86477381 23.86477897 23.86478002
6	bin6.5	27.3376	S6_45454406 S6_45454594	26.58147973 26.58148078
6	bin6.6	29.9416	S6_45713625	29.0803
6	bin6.7	33.2417	S6_46141212 S6_46222464	32.2007181 32.63886223
6	bin6.8	41.7559	S6_47239380	40.6859
6	bin6.9	43.0619	S6_48189884	41.9078
6	bin6.10	45.0671	S6_48521361	43.8454
6	bin6.11	46.37	S6_48878265	45.0459
6	bin6.12	49.1566	S6_49287640	47.6824
6	bin6.13	50.7486	S6_49643220 S6_49715516	49.14287496 49.37901953
6	bin6.14	52.9088	S6_50365259 S6_50539910	51.24767551 51.45867439
6	bin6.15	54.0708	S6_50626743	52.5219
6	bin6.16	56.0376	S6_51140222	54.4862
6	bin6.17	57.9117	S6_51726989	56.2895
6	bin6.18	60.6076	S6_52036046	58.9118
6	bin6.19	62.0445	S6_52141958	60.2384
6	bin6.20	63.4152	S6_52746065	61.5509
6	bin6.21	65.4455	S6_53024770	63.4236
6	bin6.22	67.2778	S6_53461592	65.0415
6	bin6.23	69.028	S6_53653469 S6_53661471	66.45748851 66.68952202
6	bin6.24	72.7104	S6_54392368	70.1938
6	bin6.25	76.687	S6_55548677	74.0313
6	bin6.26	78.469	S6_56037572	75.609
6	bin6.27	84.0587	S6_56646221	81.0139
6	bin6.28	88.8543	S6_57867095	85.6674
6	bin6.29	90.0142	S6_58139826	86.7158
6	bin6.30	92.4593	S6_58414069 S6_58531384	88.78486848 89.03355181
6	bin6.31	93.9456	S6_58810452 S6_58900896 S6_58961166	90.07659669 90.850642 90.85064305
6	bin6.32	98.083	S6_59306006	94.2925
6	bin6.33	99.8136	S6_59364471	95.7883
6	bin6.34	102.213	S6_59795177	98.1235
6	bin6.35	104.549	S6_60253893	100.027
6	bin6.36	106.567	S6_60407679 S6_60499220	101.7522486 101.7522497
6	bin6.37	108.491	S6_60832933 S6_60932972	103.5079967 103.5079977
6	bin6.38	110.037	S6_61208773 S6_61208936	104.9427672 104.9427682
6	bin6.39	111.833	S6_61440244 S6_61535145	106.6006303 106.9452086
7	bin7.1	0	S7_1147401	0
7	bin7.2	4.51674	S7_1861602	4.25502
7	bin7.3	8.21148	S7_2176672	7.51423
7	bin7.4	15.0047	S7_2921982	14.0478
7	bin7.5	16.7218	S7_3055489	15.7054
7	bin7.6	25.6255	S7_4376607	24.5217
7	bin7.7	32.2488	S7_4780777	30.9823
7	bin7.8	49.9845	S7_6784608	48.4848
7	bin7.9	51.5861	S7_6968877	49.8435
7	bin7.10	58.4445	S7_8843716	56.5679
7	bin7.11	62.8833	S7_11967298 S7_40382497 S7_48970089	60.76768882 61.00536725 61.0053683
7	bin7.12	65.9904	S7_53130309 S7_53167458 S7_53704344	63.8486398 63.84864085 64.31739577
7	bin7.13	67.6783	S7_54507551	65.7647
7	bin7.14	70.625	S7_55277054	68.5918
7	bin7.15	74.4799	S7_56127651 S7_56216365 S7_56267417	71.99226067 72.61390314 73.21472659
7	bin7.16	78.6445	S7_56890374	76.6331
7	bin7.17	83.3456	S7_57736751	81.2838
7	bin7.18	88.9386	S7_58394735	86.9574
7	bin7.19	97.9855	S7_59450874 S7_59487289	95.78912324 96.667153
7	bin7.20	101.329	S7_59874150 S7_59921215 S7_60056219	99.41950607 100.0841971 100.3827215
7	bin7.21	105.739	S7_60704271 S7_60839810	103.8714807 104.4322565
7	bin7.22	108.802	S7_61205886	106.999
7	bin7.23	110.355	S7_61308415 S7_61343812	108.111771 108.1117721
7	bin7.24	113.338	S7_61743374	110.905
7	bin7.25	114.58	S7_61884493	112.154
7	bin7.26	115.758	S7_62039773	113.347
7	bin7.27	121.435	S7_62653284 S7_62806212	118.4589573 119.0215953
7	bin7.28	123.518	S7_63061384 S7_63107211	120.7325696 120.7325706
7	bin7.29	125.758	S7_63642798	122.845
7	bin7.30	127.808	S7_64147866 S7_64307792	124.8633008 124.977691
8	bin8.1	0	S8_1220994	0
8	bin8.2	9.93326	S8_2351983	9.8053
8	bin8.3	11.2343	S8_2558382	10.9509
8	bin8.4	13.2988	S8_2709125	12.7275
8	bin8.5	31.0765	S8_4292328	30.1962
8	bin8.6	41.4193	S8_6055856 S8_6056426 S8_6154294 S8_6154754 S8_6154911 S8_6196114	40.53105632 40.53105737 41.40183095 41.401832 41.63916252 41.63916357
8	bin8.7	46.1279	S8_7738160 S8_11132623 S8_11132626	46.1746646 46.80718923 46.80719028
8	bin8.8	47.5364	S8_27822232 S8_38534649 S8_38534789	48.34138153 48.53209208 48.53209313
8	bin8.9	49.7057	S8_45760605 S8_45760727	50.36758891 50.55395575
8	bin8.10	55.6434	S8_47226821 S8_47285438	56.16150479 56.33985525
8	bin8.11	58.4086	S8_47509086 S8_47595585 S8_47807933	58.75171322 59.72214782 60.6919625
8	bin8.12	69.7519	S8_50150678	70.2231
8	bin8.13	72.3604	S8_50230933 S8_50379822	72.61266812 72.61266917
8	bin8.14	79.602	S8_51832449	79.7573
8	bin8.15	83.2889	S8_52305231	83.2127
8	bin8.16	84.6318	S8_52403957	84.4446
8	bin8.17	86.5792	S8_52822809	86.3864
8	bin8.18	89.486	S8_53092639	89.2091
8	bin8.19	90.9373	S8_53263129	90.6241
8	bin8.20	95.7127	S8_53611077	95.1746
8	bin8.21	101.607	S8_54415360	100.793
9	bin9.1	0	S9_57352 S9_381828	0 0.282778132
9	bin9.2	14.7018	S9_1805149	14.6973
9	bin9.3	36.3193	S9_4013764	36.0883
9	bin9.4	39.7294	S9_4535057	39.2378
9	bin9.5	45.6895	S9_5394048	45.092
9	bin9.6	50.0831	S9_6279989	49.3273
9	bin9.7	57.5628	S9_8620524	56.5329
9	bin9.8	60.6213	S9_9701143	59.3645
9	bin9.9	62.3365	S9_11977169 S9_38827362 S9_42878787 S9_43043111 S9_44159604	60.75010816 60.75010921 61.23623747 61.66024174 62.04485253
9	bin9.10	65.8882	S9_47191350	64.9175
9	bin9.11	67.8573	S9_47399448 S9_47695586	66.53443718 66.73749121
9	bin9.12	69.9216	S9_48134606	68.4903
9	bin9.13	74.51	S9_49065056	72.9175
9	bin9.14	75.7693	S9_49372007	74.0744
9	bin9.15	78.5422	S9_50000872	76.6442
9	bin9.16	82.0739	S9_50536943 S9_50715360 S9_50725635 S9_50734667	79.63410839 80.12851103 80.51465687 80.51465792
9	bin9.17	89.8451	S9_51983645 S9_52118194	87.59621227 87.80680151
9	bin9.18	92.4146	S9_52576478	90.3177
9	bin9.19	95.399	S9_52885568 S9_52888868 S9_52890009	93.13004632 93.64841846 93.64841951
9	bin9.20	99.1025	S9_53139893	97.1222
9	bin9.21	107.733	S9_55750034	105.254
9	bin9.22	109.976	S9_56125890	107.226
9	bin9.23	122.435	S9_59334797 S9_59532158	119.5811323 120.5157859
10	bin10.1	0	S10_1270568	0
10	bin10.2	1.67583	S10_1350309	1.36921
10	bin10.3	5.31023	S10_1781444	4.82959
10	bin10.4	6.522	S10_2107884	6.02357
10	bin10.5	11.0703	S10_2581551	10.3594
10	bin10.6	14.3482	S10_2751996	13.2437
10	bin10.7	16.594	S10_3098940	15.3182
10	bin10.8	21.6667	S10_3639770	20.4041
10	bin10.9	22.7869	S10_4146463	21.5225
10	bin10.10	24.608	S10_4534006	23.1628
10	bin10.11	26.9413	S10_4650639 S10_4822519	24.49682912 25.33879916
10	bin10.12	29.0768	S10_5113336	26.8505
10	bin10.13	30.9368	S10_5253643	28.6206
10	bin10.14	34.4893	S10_5699754	32.0863
10	bin10.15	37.9602	S10_6424330	35.3378
10	bin10.16	40.9334	S10_6732567 S10_7288327	38.05803932 38.88259939
10	bin10.17	46.7931	S10_8081773 S10_8140663	44.15200431 44.51585854
10	bin10.18	48.5958	S10_8603619 S10_8749440	46.15639039 46.15639144
10	bin10.19	52.6904	S10_9792283 S10_9938693	49.99245906 50.14534272
10	bin10.20	56.1924	S10_12261112	53.3795
10	bin10.21	57.842	S10_17059647 S10_18192755 S10_44089727 S10_47225278 S10_47834967 S10_48084248	54.39768751 55.35858679 55.35858784 56.14877753 56.9671885 57.72831085
10	bin10.22	63.4965	S10_48926490 S10_49433481 S10_49433516	60.6373677 61.1007541 61.10075515
10	bin10.23	64.9964	S10_50151749 S10_50521034	62.29256473 62.85267433
10	bin10.24	67.0971	S10_51202718 S10_51494508	64.19622348 64.86269863
10	bin10.25	68.9677	S10_51756627 S10_51756774	66.2976624 66.29766345
10	bin10.26	70.9221	S10_52241838	68.0334
10	bin10.27	73.2629	S10_52473813	70.1264
10	bin10.28	74.4641	S10_52669983	71.2891
10	bin10.29	76.2142	S10_53354348	72.781
10	bin10.30	79.903	S10_53767052	76.2814
10	bin10.31	82.3223	S10_54087004	78.4442
10	bin10.32	86.8298	S10_55174111	82.7767
10	bin10.33	88.002	S10_55279847	83.9231
10	bin10.34	92.8079	S10_55949337	88.5757
10	bin10.35	95.2153	S10_56511367	90.9061
10	bin10.36	97.4136	S10_56740774	93.0604
10	bin10.37	101.266	S10_57382061	96.922
10	bin10.38	102.658	S10_57428185	98.1879
10	bin10.39	107.41	S10_57986848 S10_57986849 S10_57986857	102.8891131 102.8891142 102.8891152
10	bin10.40	109.811	S10_58152927	105.095
10	bin10.41	111.591	S10_58284826	106.591
10	bin10.42	114.482	S10_58600031	109.246
10	bin10.43	115.875	S10_58888012	110.424
10	bin10.44	117.561	S10_59265285	111.997
10	bin10.45	121.28	S10_59656735 S10_59882311	115.0994204 116.0217952
10	bin10.46	126.054	S10_60305595 S10_60560672	119.7492432 120.5830616
